# Supplementary material for: Blue-Winged Teals in Guatemala and Their Potential Role in the Ecology of H14 Subtype Influenza a Viruses
Source: MDPI journal article supplement (doi:10.3390/v15020483), 2023-02-09
Supplement: s1 [file s1]

Table S13. Bayes Factor and Posterior Probability values using HA cleavage site as a discrete trait

| FROM    | TO      | BAYES FACTOR | POSTERIOR PROBABILITY |
|---------|---------|--------------|-----------------------|
| PDKQTRG | PDRQTRG | 209.4707535  | 0.984668              |
| PDKQTRG | PDKQTKG | 0.581013868  | 0.151205              |
| PDKQTRG | PDKQAKG | 0.537749788  | 0.14154               |
| PDKQTRG | PGKQAKG | 0.583026727  | 0.15165               |
| PDRQTRG | PDKQTKG | 550.6451748  | 0.994112              |
| PDRQTRG | PDKQAKG | 0.462564191  | 0.124208              |
| PDRQTRG | PGKQAKG | 0.541194733  | 0.142318              |
| PDKQTKG | PDKQAKG | 3258.633522  | 0.999                 |
| PDKQTKG | PGKQAKG | 0.975306058  | 0.230197              |
| PDKQAKG | PGKQAKG | 2.184035042  | 0.401067              |
| PDRQTRG | PDKQTRG | 0.771583905  | 0.191312              |
| PDKQTKG | PDKQTRG | 1.066501466  | 0.246417              |
| PDKQAKG | PDKQTRG | 3.079084075  | 0.485613              |
| PGKQAKG | PDKQTRG | 19.54892227  | 0.857016              |
| PDKQTKG | PDRQTRG | 0.786599645  | 0.194312              |
| PDKQAKG | PDRQTRG | 1.265384145  | 0.279524              |
| PGKQAKG | PDRQTRG | 0.790510884  | 0.195089              |
| PDKQAKG | PDKQTKG | 1.074171886  | 0.24775               |
| PGKQAKG | PDKQTKG | 0.836897534  | 0.2042                |
| PGKQAKG | PDKQAKG | 0.973472458  | 0.229863              |
