# Supplementary material for: Blue-Winged Teals in Guatemala and Their Potential Role in the Ecology of H14 Subtype Influenza a Viruses
Source: MDPI journal article supplement (doi:10.3390/v15020483), 2023-02-09
Supplement: s1 [file s1]

Table S15. Best ten Blast hits of A/blue-winged-teal/Guatemala/CIP049H117-34/2013 and A/blue-winged-teal/Guatemala/CIP049H117-143/2013

| Identity (%) | Blast hit                                   | GeneBank accession no. |
|--------------|---------------------------------------------|------------------------|
| 99.666       | A/mallard/Ohio/13OS1979/2013(H10N7)         | KX013057.1             |
| 99.599       | A/blue-winged teal/Iowa/13OS2367/2013(H4N8) | KJ568242.1             |
|              | A/American black                            |                        |
| 99.532       | duck/Maryland/13OS2956/2013(H11N9)          | CY191278.1             |
| 99.532       | A/blue-winged teal/Iowa/13OS2339/2013(H4N8) | KJ568074.1             |
| 99.465       | A/mallard/Ontario/13OS4098/2013(H10N3)      | KX013063.1             |
| 99.465       | A/mallard/Maryland/13OS2946/2013(H5N2)      | CY191270.1             |
| 99.198       | A/blue-winged teal/Ohio/13OS2064/2013(H4N6) | KJ568290.1             |
|              | A/American green-winged                     |                        |
| 99.198       | teal/Ohio/13OS2065/2013(H4N6)               | KJ568418.1             |
|              | A/American green-winged                     |                        |
| 99.132       | teal/Ohio/13OS2063/2013(H4N6)               | KJ567994.1             |
|              | A/American green-winged                     |                        |
| 98.93        | teal/Alaska/137916/2009(H3N8)               | KX714451.1             |
