# Supplementary material for: Blue-Winged Teals in Guatemala and Their Potential Role in the Ecology of H14 Subtype Influenza a Viruses
Source: MDPI journal article supplement (doi:10.3390/v15020483), 2023-02-09
Supplement: s1 [file s1]

Table S12. Bayes Factor and Posterior Probability values using geographic location as a discrete trait

| FROM          | TO            | BAYES FACTOR | POSTERIOR PROBABILITY |
|---------------|---------------|--------------|-----------------------|
| Guatemala     | North America | 0.691560319  | 0.360293              |
| Guatemala     | Eurasia       | 40.63620911  | 0.97067               |
| North America | Eurasia       | 14.62882148  | 0.922564              |
| North America | Guatemala     | 2.473435592  | 0.668259              |
| Eurasia       | Guatemala     | 1.785241748  | 0.59249               |
| Eurasia       | North America | 11050.89079  | 1                     |
