# Supplementary material for: Blue-Winged Teals in Guatemala and Their Potential Role in the Ecology of H14 Subtype Influenza a Viruses
Source: MDPI journal article supplement (doi:10.3390/v15020483), 2023-02-09
Supplement: s1 [file s1]

Table S14. Bayes Factor and Posterior Probability values using Neuraminidase subtype as a discrete trait

| FROM  | TO    | BAYES FACTOR | POSTERIOR PROBABILITY |
|-------|-------|--------------|-----------------------|
| N4    | N3    | 4.554440094  | 0.420398              |
| N4    | Mixed | 0.610010587  | 0.088546              |
| N4    | N5    | 0.690720359  | 0.0991                |
| N4    | N7    | 0.86787705   | 0.121431              |
| N4    | N6    | 13.87021671  | 0.688368              |
| N4    | N8    | 0.665882825  | 0.095878              |
| N4    | N2    | 0.581577309  | 0.084768              |
| N3    | Mixed | 564.621093   | 0.989001              |
| N3    | N5    | 4703.648258  | 0.998667              |
| N3    | N7    | 7.082290755  | 0.530052              |
| N3    | N6    | 0.975207133  | 0.13443               |
| N3    | N8    | 0.396807819  | 0.059438              |
| N3    | N2    | 18833.43065  | 0.999667              |
| Mixed | N5    | 0.99668647   | 0.136985              |
| Mixed | N7    | 1.251657771  | 0.166204              |
| Mixed | N6    | 1.255673696  | 0.166648              |
| Mixed | N8    | 0.868780944  | 0.121542              |
| Mixed | N2    | 1.105054865  | 0.14965               |
| N5    | N7    | 59.28823009  | 0.904233              |
| N5    | N6    | 0.709681453  | 0.101544              |
| N5    | N8    | 0.502547412  | 0.074103              |
| N5    | N2    | 0.496043693  | 0.073214              |
| N7    | N6    | 3.591407322  | 0.363848              |
| N7    | N8    | 507.5310631  | 0.987779              |
| N7    | N2    | 0.3374099    | 0.050994              |
| N6    | N8    | 0.418167264  | 0.062438              |
| N6    | N2    | 0.412616517  | 0.06166               |
| N8    | N2    | 1.177143951  | 0.157871              |
| N3    | N4    | 0.858850677  | 0.12032               |
| Mixed | N4    | 0.99762324   | 0.137096              |
| N5    | N4    | 0.589915645  | 0.085879              |
| N7    | N4    | 7.187348982  | 0.533718              |
| N6    | N4    | 4.390820752  | 0.41151               |
| N8    | N4    | 1.848365524  | 0.227419              |
| N2    | N4    | 1.091572908  | 0.148095              |
| Mixed | N3    | 1.931010785  | 0.235196              |
| N5    | N3    | 0.612530725  | 0.088879              |
| N7    | N3    | 1.214712406  | 0.162093              |
| N6    | N3    | 289.6324675  | 0.97878               |

|    |       |             |          |
|----|-------|-------------|----------|
| N8 | N3    | 1.502582862 | 0.19309  |
| N2 | N3    | 1.122461451 | 0.15165  |
| N5 | Mixed | 0.478222616 | 0.07077  |
| N7 | Mixed | 0.330445856 | 0.049994 |
| N6 | Mixed | 0.411032279 | 0.061438 |
| N8 | Mixed | 1.10988181  | 0.150206 |
| N2 | Mixed | 5.802694696 | 0.48028  |
| N7 | N5    | 0.648856376 | 0.093656 |
| N6 | N5    | 0.466930662 | 0.069215 |
| N8 | N5    | 1.369884886 | 0.179091 |
| N2 | N5    | 1.207763482 | 0.161315 |
| N6 | N7    | 0.543480252 | 0.079658 |
| N8 | N7    | 1.777690992 | 0.220642 |
| N2 | N7    | 1.425146853 | 0.184979 |
| N8 | N6    | 2.06433287  | 0.247417 |
| N2 | N6    | 1.320516008 | 0.173758 |
| N2 | N8    | 0.994813653 | 0.136763 |

---
