# Supplementary material for: Blue-Winged Teals in Guatemala and Their Potential Role in the Ecology of H14 Subtype Influenza a Viruses
Source: MDPI journal article supplement (doi:10.3390/v15020483), 2023-02-09
Supplement: s1 [file s1]

Suppl. Table S9. Detailed nucleotide pairwise identity of ORF sequences of NA N3 gene segment of full-length H14 viruses from Guatemala (n=40), North America (n=12), and Eurasia (n=4) during 1982-2019.

| # virus | Strain                                          | Reference ID  | 1    | 2    | 4    | 5    | 6    | 7    | 9    | 11   | 12   | 14   | 16   | 22   | 17   | 23   | 18   | 24   | 25   | 26   | 27   | 28   | 29   | 30   | 31   | 32   | 33   | 38   | 39   | 48   | 53   | 55   |
|---------|-------------------------------------------------|---------------|------|------|------|------|------|------|------|------|------|------|------|------|------|------|------|------|------|------|------|------|------|------|------|------|------|------|------|------|------|------|
| 1       | Abiue_winged_islat/Guatemala/CP049H106_15/2011  | KJ169276      |      |      |      |      |      |      |      |      |      |      |      |      |      |      |      |      |      |      |      |      |      |      |      |      |      |      |      |      |      |      |
| 2       | Abiue_winged_islat/Guatemala/CP049H106_31/2011  | KY644481      | 94.5 |      |      |      |      |      |      |      |      |      |      |      |      |      |      |      |      |      |      |      |      |      |      |      |      |      |      |      |      |      |
| 4       | Abiue_winged_islat/Guatemala/CP049H108_02/2012  | KY644425      | 95.4 | 95   |      |      |      |      |      |      |      |      |      |      |      |      |      |      |      |      |      |      |      |      |      |      |      |      |      |      |      |      |
| 5       | Abiue_winged_islat/Guatemala/CP049H108_04/2012  | KX360401      | 95.5 | 95.1 | 99.9 |      |      |      |      |      |      |      |      |      |      |      |      |      |      |      |      |      |      |      |      |      |      |      |      |      |      |      |
| 6       | Abiue_winged_islat/Guatemala/CP049H108_11/2012  | KX360439      | 95.5 | 95   | 99.8 | 99.9 |      |      |      |      |      |      |      |      |      |      |      |      |      |      |      |      |      |      |      |      |      |      |      |      |      |      |
| 7       | Abiue_winged_islat/Guatemala/CP049H109_49/2012  | KY644327      | 95.5 | 95.1 | 99.9 | 100  | 99.9 |      |      |      |      |      |      |      |      |      |      |      |      |      |      |      |      |      |      |      |      |      |      |      |      |      |
| 9       | Abiue_winged_islat/Guatemala/CP049H109_76/2012  | KX360432      | 95.5 | 95.1 | 99.9 | 100  | 99.9 | 100  |      |      |      |      |      |      |      |      |      |      |      |      |      |      |      |      |      |      |      |      |      |      |      |      |
| 11      | Abiue_winged_islat/Guatemala/CP049H110_31/2012  | KY644476      | 95.6 | 95.2 | 99.5 | 99.6 | 99.6 | 99.6 | 99.6 |      |      |      |      |      |      |      |      |      |      |      |      |      |      |      |      |      |      |      |      |      |      |      |
| 12      | Abiue_winged_islat/Guatemala/CP049H113_07/2013  | KY644194      | 95.4 | 95   | 99.9 | 99.8 | 99.9 | 99.9 | 99.9 | 99.9 |      |      |      |      |      |      |      |      |      |      |      |      |      |      |      |      |      |      |      |      |      |      |
| 14      | Abiue_winged_islat/Guatemala/CP049H113_74/2013  | KY373158      | 95.3 | 94.9 | 99.8 | 99.8 | 99.7 | 99.8 | 99.8 | 99.4 | 99.8 |      |      |      |      |      |      |      |      |      |      |      |      |      |      |      |      |      |      |      |      |      |
| 16      | Abiue_winged_islat/Guatemala/CP049H116_12/2013  | MK327720      | 95   | 94.5 | 99.4 | 99.6 | 98.5 | 98.6 | 98.6 | 98.7 | 98.4 | 98.4 |      |      |      |      |      |      |      |      |      |      |      |      |      |      |      |      |      |      |      |      |
| 22      | Abiue_winged_islat/Guatemala/CP049H117_13/2013  | MK327688      | 95.1 | 94.5 | 98.4 | 98.6 | 98.5 | 98.6 | 98.6 | 98.7 | 98.4 | 98.4 | 99.9 |      |      |      |      |      |      |      |      |      |      |      |      |      |      |      |      |      |      |      |
| 17      | Abiue_winged_islat/Guatemala/CP049H117_34/2013  | MK327696      | 94.8 | 94.4 | 98.3 | 98.4 | 98.4 | 98.4 | 98.4 | 98.5 | 98.3 | 98.2 | 99.7 | 99.7 |      |      |      |      |      |      |      |      |      |      |      |      |      |      |      |      |      |      |
| 23      | Abiue_winged_islat/Guatemala/CP049H117_123/2013 | MK327728      | 95   | 94.6 | 98.5 | 98.7 | 98.6 | 98.7 | 98.7 | 98.7 | 98.5 | 98.4 | 99.9 | 99.9 | 99.8 |      |      |      |      |      |      |      |      |      |      |      |      |      |      |      |      |      |
| 18      | Abiue_winged_islat/Guatemala/CP049H117_143/2013 | MK327760      | 95   | 94.6 | 98.5 | 98.7 | 98.6 | 98.7 | 98.7 | 98.7 | 98.5 | 98.4 | 99.9 | 99.9 | 99.8 | 100  |      |      |      |      |      |      |      |      |      |      |      |      |      |      |      |      |
| 24      | Abiue_winged_islat/Guatemala/CP049H123_13/2014  | OP144070      | 94.7 | 94.2 | 98.4 | 98.5 | 98.4 | 98.5 | 98.5 | 98.6 | 98.4 | 98.3 | 97.5 | 97.5 | 97.6 | 97.6 | 97.6 |      |      |      |      |      |      |      |      |      |      |      |      |      |      |      |
| 25      | Abiue_winged_islat/Guatemala/CP049H123_16/2014  | OP144078      | 94.7 | 94.1 | 98.3 | 98.4 | 98.4 | 98.4 | 98.4 | 98.5 | 98.3 | 98.2 | 97.4 | 97.4 | 97.3 | 97.5 | 97.5 | 99.6 |      |      |      |      |      |      |      |      |      |      |      |      |      |      |
| 26      | Abiue_winged_islat/Guatemala/CP049H123_23/2014  | OP144086      | 94.7 | 94.2 | 98.4 | 98.5 | 98.4 | 98.5 | 98.5 | 98.6 | 98.4 | 98.3 | 97.5 | 97.5 | 97.4 | 97.6 | 97.6 | 100  | 99.6 |      |      |      |      |      |      |      |      |      |      |      |      |      |
| 27      | Abiue_winged_islat/Guatemala/CP049H123_27/2014  | OP144084      | 94.7 | 94.2 | 98.4 | 98.5 | 98.4 | 98.5 | 98.5 | 98.6 | 98.4 | 98.3 | 97.5 | 97.5 | 97.4 | 97.6 | 97.6 | 100  | 99.6 | 100  |      |      |      |      |      |      |      |      |      |      |      |      |
| 28      | Abiue_winged_islat/Guatemala/CP049H123_58/2014  | OP144102      | 94.7 | 94.2 | 98.4 | 98.5 | 98.4 | 98.5 | 98.5 | 98.6 | 98.4 | 98.3 | 97.5 | 97.5 | 97.4 | 97.6 | 97.6 | 100  | 99.6 | 100  | 100  |      |      |      |      |      |      |      |      |      |      |      |
| 29      | Abiue_winged_islat/Guatemala/CP049H123_28/2014  | OP144110      | 94.7 | 94.2 | 98.4 | 98.5 | 98.4 | 98.5 | 98.5 | 98.6 | 98.4 | 98.3 | 97.5 | 97.5 | 97.4 | 97.6 | 97.6 | 100  | 99.6 | 100  | 100  | 100  |      |      |      |      |      |      |      |      |      |      |
| 30      | Abiue_winged_islat/Guatemala/CP049H123_61/2014  | OP144118      | 94.7 | 94.2 | 98.4 | 98.5 | 98.4 | 98.5 | 98.5 | 98.6 | 98.4 | 98.3 | 97.5 | 97.5 | 97.4 | 97.6 | 97.6 | 100  | 99.6 | 100  | 100  | 100  | 100  |      |      |      |      |      |      |      |      |      |
| 31      | Abiue_winged_islat/Guatemala/CP049H123_65/2014  | OP144126      | 94.7 | 94.1 | 98.3 | 98.4 | 98.4 | 98.4 | 98.4 | 98.5 | 98.3 | 98.2 | 97.4 | 97.4 | 97.3 | 97.5 | 97.5 | 99.9 | 99.5 | 99.9 | 99.9 | 99.9 | 99.9 | 99.9 |      |      |      |      |      |      |      |      |
| 32      | Abiue_winged_islat/Guatemala/CP049H123_75/2014  | OP144135      | 94.7 | 94.1 | 98.3 | 98.4 | 98.4 | 98.4 | 98.4 | 98.5 | 98.3 | 98.2 | 97.4 | 97.4 | 97.3 | 97.5 | 97.5 | 99.9 | 99.5 | 99.9 | 99.9 | 99.9 | 99.9 | 99.9 | 99.9 |      |      |      |      |      |      |      |
| 33      | Abiue_winged_islat/Guatemala/CP049H123_78/2014  | OP144144      | 94.7 | 94.2 | 98.4 | 98.5 | 98.4 | 98.5 | 98.5 | 98.6 | 98.4 | 98.3 | 97.5 | 97.5 | 97.4 | 97.6 | 97.6 | 100  | 99.6 | 100  | 100  | 100  | 100  | 100  | 100  | 100  | 100  | 100  | 100  | 100  | 100  | 100  |
| 38      | Abiue_winged_islat/Guatemala/CP049H158_26/2019  | OP144184      | 93.9 | 93.9 | 97.1 | 97.2 | 97.2 | 97.2 | 97.2 | 97.4 | 97.1 | 97   | 96.8 | 96.8 | 96.7 | 96.9 | 96.9 | 97   | 96.8 | 97   | 97   | 97   | 97   | 97   | 97   | 97   | 97   | 97   | 97   | 97   | 97   | 97   |
| 39      | Abiue_winged_islat/Guatemala/CP049H189_08/2019  | OP144193      | 94.8 | 94.3 | 97.7 | 97.8 | 97.7 | 97.8 | 97.8 | 97.7 | 97.6 | 96.9 | 96.9 | 96.8 | 97   | 97.7 | 97.7 | 97.7 | 97.7 | 97.7 | 97.7 | 97.7 | 97.7 | 97.7 | 97.7 | 97.7 | 97.7 | 97.7 | 97.7 | 97.7 | 97.7 | 97.7 |
| 40      | Abiue_winged_islat/Guatemala/CP049H189_08/2019  | MP359230      | 95.3 | 95.4 | 93.5 | 93.7 | 93.6 | 93.7 | 93.7 | 93.8 | 93.5 | 93.3 | 93.4 | 93.3 | 93.3 | 93.3 | 93.3 | 93.3 | 93.3 | 93.3 | 93.3 | 93.3 | 93.3 | 93.3 | 93.3 | 93.3 | 93.3 | 93.3 | 93.3 | 93.3 | 93.3 | 93.3 |
| 53      | ACommon_Tsai/Chany_Lake/28/2019                 | EP1_58_400267 | 84.9 | 86.2 | 84.8 | 84.9 | 84.8 | 84.9 | 84.9 | 84.9 | 84.8 | 84.8 | 84.9 | 84.8 | 84.7 | 84.9 | 84.9 | 84.8 | 84.7 | 84.8 | 84.8 | 84.8 | 84.8 | 84.8 | 84.8 | 84.8 | 84.8 | 84.8 | 84.8 | 84.8 | 84.8 | 84.8 |
| 55      | Agoset/Karachi/NARC_13N_869/2014                | K0560270      | 85.2 | 85.6 | 84.9 | 85   | 85   | 85   | 85   | 85   | 85   | 85   | 85.2 | 85.1 | 85.2 | 85.2 | 85.2 | 85.3 | 85.2 | 85.3 | 85.3 | 85.3 | 85.3 | 85.3 | 85.3 | 85.3 | 85.3 | 85.3 | 85.3 | 85.4 | 85.4 | 93.3 |
