# Supplementary material for: Blue-Winged Teals in Guatemala and Their Potential Role in the Ecology of H14 Subtype Influenza a Viruses
Source: MDPI journal article supplement (doi:10.3390/v15020483), 2023-02-09
Supplement: s1 [file s1]

Suppl. Table S11. Detailed nucleotide pairwise identity of ORF sequences of NA N5 gene segment of full-length H14 viruses from Guatemala (n=40), North America (n=12), and Eurasia (n=4) during 1982-2019.

| # virus | Strain                                          | Reference ID | 19   | 20   | 21   | 31   | 41 |
|---------|-------------------------------------------------|--------------|------|------|------|------|----|
| 19      | A/blue_winged_teal/Guatemala/CIP049H117_36/2013 | MK327704     |      |      |      |      |    |
| 20      | A/blue_winged_teal/Guatemala/CIP049H117_38/2013 | MK326658     | 100  |      |      |      |    |
| 21      | A/blue_winged_teal/Guatemala/CIP049H117_99/2013 | MK327736     | 99.9 | 99.9 |      |      |    |
| 31      | A/blue-winged_teal/Guatemala/CIP049H123_65/2014 | OP144127     | 96.3 | 96.3 | 96.2 |      |    |
| 41      | A/Blue_winged_Teal/Ohio/18OS1695/2018           | MN431051     | 94.7 | 94.7 | 94.7 | 97.3 |    |
