# Supplementary material for: Blue-Winged Teals in Guatemala and Their Potential Role in the Ecology of H14 Subtype Influenza a Viruses
Source: MDPI journal article supplement (doi:10.3390/v15020483), 2023-02-09
Supplement: s1 [file s1]

Suppl. Table S10. Detailed nucleotide pairwise identity of ORF sequences of NA N4 gene segment of full-length H14 viruses from Guatemala (n=40), North America (n=12), and Eurasia (n=4) during 1982-2019.

| # virus | Strain                                           | Reference ID | 13   | 15   | 34   | 35   | 36   | 37   | 40 |
|---------|--------------------------------------------------|--------------|------|------|------|------|------|------|----|
| 13      | A/blue_winged_teal/Guatemala/CIP049H113_08/2013  | KY644436     |      |      |      |      |      |      |    |
| 15      | A/blue_winged_teal/Guatemala/CIP049H113_76/2013  | KY644370     | 100  |      |      |      |      |      |    |
| 34      | A/blue-winged_teal/Guatemala/CIP049H125_14/2015  | OP144152     | 96.8 | 96.8 |      |      |      |      |    |
| 35      | A/blue-winged_teal/Guatemala/CIP049H125_23/2015  | OP144160     | 97   | 97   | 99.6 |      |      |      |    |
| 36      | A/blue-winged_teal/Guatemala/CIP049H125_59/2015  | OP144168     | 96.7 | 96.7 | 99.4 | 99.3 |      |      |    |
| 37      | A/blue-winged_teal/Guatemala/CIP049H125_108/2015 | OP144176     | 96.9 | 96.9 | 99.5 | 99.9 | 99.2 |      |    |
| 40      | A/blue-winged_teal/Guatemala/CIP049H189_19/2019  | OP144201     | 96.5 | 96.5 | 94.8 | 95   | 94.7 | 94.9 |    |
